# Supplementary material
Source: PubMed Central journal article supplement (PMC4553106)

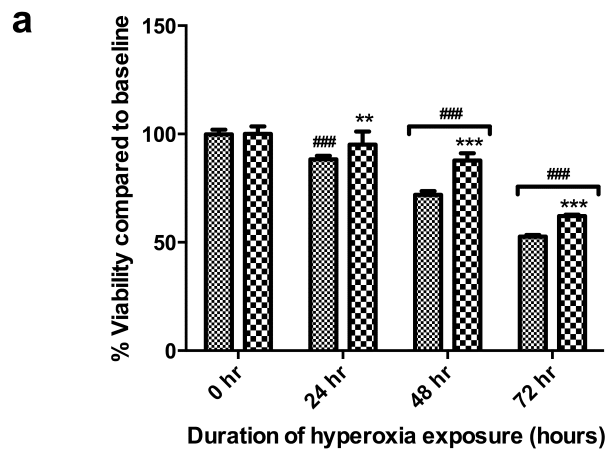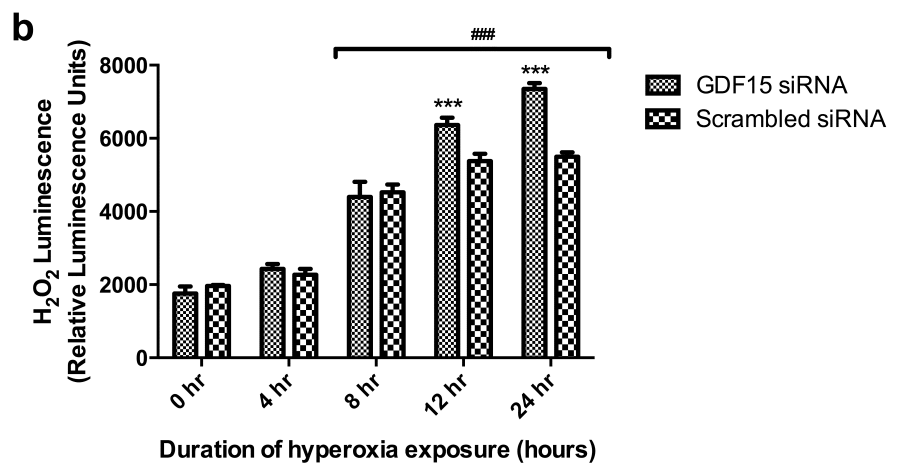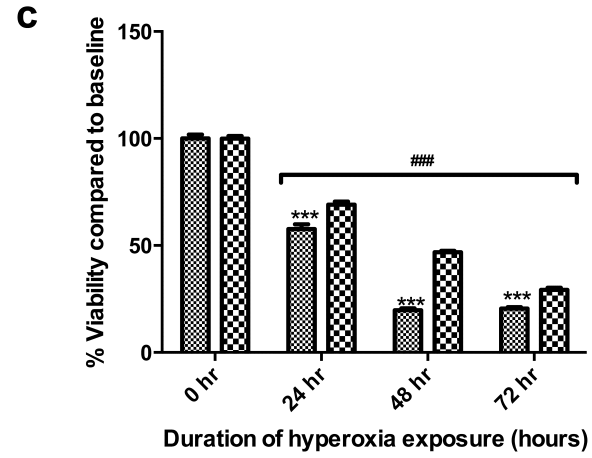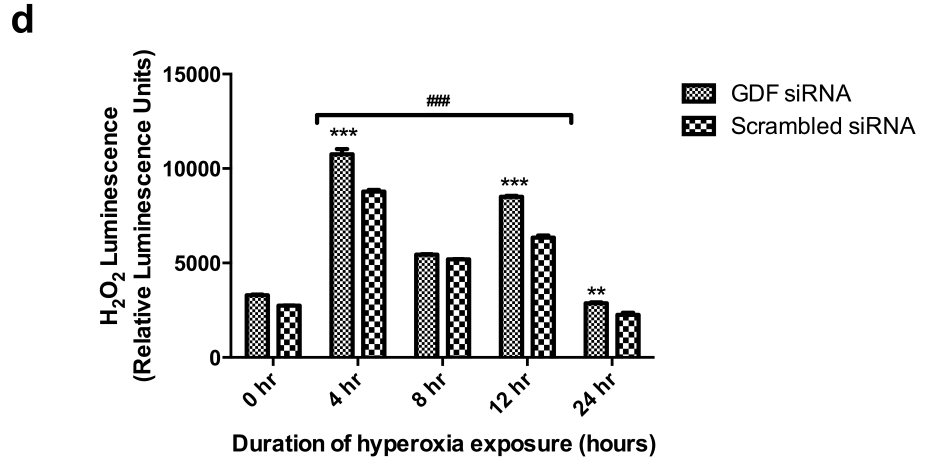

Supplement: NIHMS701244-supplement-1.pdf [file NIHMS701244-supplement-1.pdf]

**Room Air**

**Hyperoxia**

24 hr 24 hr 24 hr 48 hr 48 hr 48 hr 72 hr 72 hr 72 hr 24 hr 24hr 24 hr 48 hr 48 hr 48 hr 72 hr 72 hr 72 hr

**GDF15 (13 kD)**

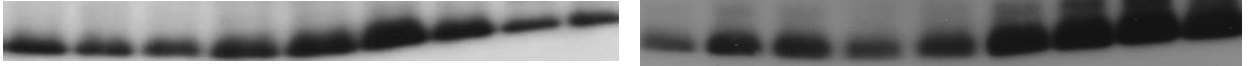

**β-actin (42 kD)**

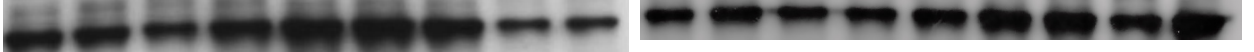

Supplement: NIHMS701244-supplement-3.pdf [file NIHMS701244-supplement-3.pdf]
